# Supplementary material for: Combining the Effects of Global Warming, Land Use Change and Dispersal Limitations to Predict the Future Distributions of East Asian Cerris Oaks (Quercus Section Cerris, Fagaceae) in China
Source: MDPI journal article supplement (doi:10.3390/f13030367), 2022-02-22
Supplement: s1 [file s1]

Supplementary Information for

Predicting impacts of global warming, land use change and  
dispersal limitations on range dynamics of East Asian  
*Cerris* oaks (*Quercus* section *Cerris*, Fagaceae) in China

This file includes:

Table S1: Occurrence data of three East Asian *Cerris* oaks in China.

Table S2 Climate variables and their abbreviations in our research.

Table S3 Pearson correlation coefficients among 7 selected climate variables.

**Table S1.** Occurrence data of three East Asian *Cerris* oaks (*Quercus acutissima*  
Carruth., *Q. variabilis* Blume and *Q. chenii* Nakai) in China.

| species              | longitude | latitude | species              | longitude | latitude | species          | longitude | latitude |
|----------------------|-----------|----------|----------------------|-----------|----------|------------------|-----------|----------|
| <i>Q. acutissima</i> | 118.11    | 29.91    | <i>Q. variabilis</i> | 117.04    | 30.62    | <i>Q. chenii</i> | 116.13    | 30.45    |
| <i>Q. acutissima</i> | 118.17    | 32.16    | <i>Q. variabilis</i> | 117.81    | 30.49    | <i>Q. chenii</i> | 116.91    | 30       |
| <i>Q. acutissima</i> | 117.96    | 32.05    | <i>Q. variabilis</i> | 117.85    | 30.62    | <i>Q. chenii</i> | 117.88    | 30.55    |
| <i>Q. acutissima</i> | 118.79    | 30.02    | <i>Q. variabilis</i> | 118.30    | 32.28    | <i>Q. chenii</i> | 118.08    | 30.19    |
| <i>Q. acutissima</i> | 118.11    | 30.05    | <i>Q. variabilis</i> | 117.02    | 31.73    | <i>Q. chenii</i> | 117.72    | 29.85    |
| <i>Q. acutissima</i> | 118.11    | 29.36    | <i>Q. variabilis</i> | 116.75    | 33.92    | <i>Q. chenii</i> | 118.44    | 29.87    |
| <i>Q. acutissima</i> | 117.49    | 30.37    | <i>Q. variabilis</i> | 118.31    | 30.16    | <i>Q. chenii</i> | 118.11    | 29.84    |
| <i>Q. acutissima</i> | 115.42    | 33.16    | <i>Q. variabilis</i> | 118.43    | 29.86    | <i>Q. chenii</i> | 118.19    | 29.61    |
| <i>Q. acutissima</i> | 117.75    | 26.43    | <i>Q. variabilis</i> | 116.23    | 31.23    | <i>Q. chenii</i> | 115.64    | 31.68    |
| <i>Q. acutissima</i> | 119.23    | 26.03    | <i>Q. variabilis</i> | 116.13    | 31.39    | <i>Q. chenii</i> | 115.88    | 31.16    |
| <i>Q. acutissima</i> | 117.56    | 27.39    | <i>Q. variabilis</i> | 116.18    | 31.43    | <i>Q. chenii</i> | 119.21    | 30.76    |
| <i>Q. acutissima</i> | 105.14    | 32.45    | <i>Q. variabilis</i> | 115.57    | 31.71    | <i>Q. chenii</i> | 119.22    | 30.65    |
| <i>Q. acutissima</i> | 105.44    | 32.99    | <i>Q. variabilis</i> | 117.04    | 31.32    | <i>Q. chenii</i> | 118.6     | 30.07    |
| <i>Q. acutissima</i> | 107.34    | 26.93    | <i>Q. variabilis</i> | 117.06    | 34.04    | <i>Q. chenii</i> | 118.5     | 27.94    |
| <i>Q. acutissima</i> | 106.67    | 34.38    | <i>Q. variabilis</i> | 119.26    | 30.78    | <i>Q. chenii</i> | 117.74    | 26.39    |
| <i>Q. acutissima</i> | 106.06    | 33.43    | <i>Q. variabilis</i> | 116.25    | 40.26    | <i>Q. chenii</i> | 115.1     | 26.73    |
| <i>Q. acutissima</i> | 104.08    | 35.83    | <i>Q. variabilis</i> | 115.83    | 39.69    | <i>Q. chenii</i> | 113.29    | 32.38    |
| <i>Q. acutissima</i> | 107.29    | 27.38    | <i>Q. variabilis</i> | 115.95    | 39.69    | <i>Q. chenii</i> | 114.09    | 31.81    |
| <i>Q. acutissima</i> | 113.74    | 25.32    | <i>Q. variabilis</i> | 116.32    | 40.00    | <i>Q. chenii</i> | 115       | 30.05    |
| <i>Q. acutissima</i> | 110.93    | 21.62    | <i>Q. variabilis</i> | 116.19    | 39.96    | <i>Q. chenii</i> | 114.38    | 30.54    |
| <i>Q. acutissima</i> | 112.93    | 23.11    | <i>Q. variabilis</i> | 116.21    | 39.98    | <i>Q. chenii</i> | 113.92    | 31.07    |

|                      |        |       |                      |        |       |                  |        |       |
|----------------------|--------|-------|----------------------|--------|-------|------------------|--------|-------|
| <i>Q. acutissima</i> | 114.08 | 23.52 | <i>Q. variabilis</i> | 116.20 | 40.00 | <i>Q. chenii</i> | 113.13 | 27.4  |
| <i>Q. acutissima</i> | 111.51 | 23.4  | <i>Q. variabilis</i> | 116.28 | 40.00 | <i>Q. chenii</i> | 112.99 | 25.21 |
| <i>Q. acutissima</i> | 113.14 | 24.98 | <i>Q. variabilis</i> | 116.44 | 40.44 | <i>Q. chenii</i> | 119.04 | 31.6  |
| <i>Q. acutissima</i> | 112.42 | 24.56 | <i>Q. variabilis</i> | 118.14 | 26.71 | <i>Q. chenii</i> | 119.75 | 31.19 |
| <i>Q. acutissima</i> | 113.22 | 23.12 | <i>Q. variabilis</i> | 118.64 | 28.04 | <i>Q. chenii</i> | 116.49 | 26.62 |
| <i>Q. acutissima</i> | 114.18 | 25.29 | <i>Q. variabilis</i> | 118.58 | 27.70 | <i>Q. chenii</i> | 115.91 | 27.34 |
| <i>Q. acutissima</i> | 114.12 | 24.01 | <i>Q. variabilis</i> | 118.45 | 25.71 | <i>Q. chenii</i> | 116.78 | 27.04 |
| <i>Q. acutissima</i> | 113.06 | 25.29 | <i>Q. variabilis</i> | 106.92 | 33.54 | <i>Q. chenii</i> | 116.64 | 27.56 |
| <i>Q. acutissima</i> | 113.05 | 25.13 | <i>Q. variabilis</i> | 105.90 | 33.70 | <i>Q. chenii</i> | 116.42 | 27.49 |
| <i>Q. acutissima</i> | 113.67 | 24.45 | <i>Q. variabilis</i> | 106.29 | 33.66 | <i>Q. chenii</i> | 116.5  | 26.42 |
| <i>Q. acutissima</i> | 112.05 | 24.25 | <i>Q. variabilis</i> | 106.18 | 33.88 | <i>Q. chenii</i> | 115.47 | 26.98 |
| <i>Q. acutissima</i> | 111.59 | 23.58 | <i>Q. variabilis</i> | 106.18 | 33.71 | <i>Q. chenii</i> | 116.05 | 29.52 |
| <i>Q. acutissima</i> | 113.05 | 24.55 | <i>Q. variabilis</i> | 105.72 | 33.48 | <i>Q. chenii</i> | 115.66 | 29.46 |
| <i>Q. acutissima</i> | 114.21 | 25.27 | <i>Q. variabilis</i> | 105.77 | 32.97 | <i>Q. chenii</i> | 116.75 | 30.05 |
| <i>Q. acutissima</i> | 109.08 | 25.4  | <i>Q. variabilis</i> | 105.74 | 32.96 | <i>Q. chenii</i> | 115.2  | 29.5  |
| <i>Q. acutissima</i> | 109.56 | 25.35 | <i>Q. variabilis</i> | 105.25 | 32.76 | <i>Q. chenii</i> | 114.88 | 29.3  |
| <i>Q. acutissima</i> | 107.26 | 24.14 | <i>Q. variabilis</i> | 105.23 | 32.72 | <i>Q. chenii</i> | 115.9  | 29.42 |
| <i>Q. acutissima</i> | 108.76 | 25.22 | <i>Q. variabilis</i> | 105.02 | 32.77 | <i>Q. chenii</i> | 114.54 | 29.03 |
| <i>Q. acutissima</i> | 107.7  | 23.62 | <i>Q. variabilis</i> | 104.98 | 32.74 | <i>Q. chenii</i> | 115.62 | 29.09 |
| <i>Q. acutissima</i> | 108.68 | 25.26 | <i>Q. variabilis</i> | 105.09 | 32.72 | <i>Q. chenii</i> | 117.75 | 28.92 |
| <i>Q. acutissima</i> | 109.52 | 25.43 | <i>Q. variabilis</i> | 104.82 | 32.80 | <i>Q. chenii</i> | 116.86 | 29.53 |
| <i>Q. acutissima</i> | 107.53 | 24.27 | <i>Q. variabilis</i> | 104.68 | 32.72 | <i>Q. chenii</i> | 116.88 | 29.36 |
| <i>Q. acutissima</i> | 106.57 | 24.79 | <i>Q. variabilis</i> | 105.28 | 33.07 | <i>Q. chenii</i> | 114.57 | 28.5  |
| <i>Q. acutissima</i> | 106.21 | 24.12 | <i>Q. variabilis</i> | 105.34 | 34.76 | <i>Q. chenii</i> | 117.87 | 29.23 |
| <i>Q. acutissima</i> | 104.87 | 24.68 | <i>Q. variabilis</i> | 106.57 | 34.32 | <i>Q. chenii</i> | 117.91 | 28.9  |
| <i>Q. acutissima</i> | 108.47 | 25.12 | <i>Q. variabilis</i> | 106.67 | 34.38 | <i>Q. chenii</i> | 114.28 | 28.49 |
| <i>Q. acutissima</i> | 106.69 | 26.6  | <i>Q. variabilis</i> | 112.50 | 24.83 | <i>Q. chenii</i> | 119.73 | 30.24 |
| <i>Q. acutissima</i> | 105.39 | 25.45 | <i>Q. variabilis</i> | 112.45 | 25.13 | <i>Q. chenii</i> | 119.57 | 30.36 |
| <i>Q. acutissima</i> | 106.58 | 25.18 | <i>Q. variabilis</i> | 112.70 | 24.78 | <i>Q. chenii</i> | 121.13 | 29.74 |
| <i>Q. acutissima</i> | 105.09 | 25.09 | <i>Q. variabilis</i> | 113.35 | 25.17 | <i>Q. chenii</i> | 120.37 | 29.81 |
| <i>Q. acutissima</i> | 108.37 | 27.56 | <i>Q. variabilis</i> | 113.18 | 25.10 | <i>Q. chenii</i> | 120.19 | 29.66 |
| <i>Q. acutissima</i> | 108.37 | 27.56 | <i>Q. variabilis</i> | 106.53 | 24.50 |                  |        |       |
| <i>Q. acutissima</i> | 108.15 | 25.38 | <i>Q. variabilis</i> | 104.96 | 24.62 |                  |        |       |
| <i>Q. acutissima</i> | 107.02 | 28.18 | <i>Q. variabilis</i> | 106.24 | 24.28 |                  |        |       |
| <i>Q. acutissima</i> | 108.11 | 26.24 | <i>Q. variabilis</i> | 105.36 | 24.16 |                  |        |       |
| <i>Q. acutissima</i> | 106.38 | 27.86 | <i>Q. variabilis</i> | 110.22 | 25.24 |                  |        |       |
| <i>Q. acutissima</i> | 108.54 | 28.04 | <i>Q. variabilis</i> | 109.92 | 25.87 |                  |        |       |
| <i>Q. acutissima</i> | 107.07 | 27.55 | <i>Q. variabilis</i> | 110.31 | 25.09 |                  |        |       |
| <i>Q. acutissima</i> | 104.43 | 26.38 | <i>Q. variabilis</i> | 107.61 | 24.01 |                  |        |       |
| <i>Q. acutissima</i> | 106.41 | 26.19 | <i>Q. variabilis</i> | 108.14 | 23.98 |                  |        |       |
| <i>Q. acutissima</i> | 108.01 | 27.13 | <i>Q. variabilis</i> | 106.64 | 25.13 |                  |        |       |
| <i>Q. acutissima</i> | 105.43 | 27.6  | <i>Q. variabilis</i> | 105.29 | 27.36 |                  |        |       |
| <i>Q. acutissima</i> | 107.54 | 28.14 | <i>Q. variabilis</i> | 104.62 | 27.23 |                  |        |       |
| <i>Q. acutissima</i> | 106.27 | 27.47 | <i>Q. variabilis</i> | 104.02 | 26.75 |                  |        |       |

|                      |        |       |                      |        |       |
|----------------------|--------|-------|----------------------|--------|-------|
| <i>Q. acutissima</i> | 105.44 | 25.1  | <i>Q. variabilis</i> | 108.43 | 25.68 |
| <i>Q. acutissima</i> | 107.32 | 25.84 | <i>Q. variabilis</i> | 107.83 | 26.22 |
| <i>Q. acutissima</i> | 109.55 | 18.39 | <i>Q. variabilis</i> | 108.01 | 26.58 |
| <i>Q. acutissima</i> | 109.45 | 19.1  | <i>Q. variabilis</i> | 108.25 | 26.47 |
| <i>Q. acutissima</i> | 109.16 | 18.75 | <i>Q. variabilis</i> | 108.12 | 26.41 |
| <i>Q. acutissima</i> | 110.37 | 19.69 | <i>Q. variabilis</i> | 107.50 | 26.29 |
| <i>Q. acutissima</i> | 109.43 | 18.53 | <i>Q. variabilis</i> | 107.52 | 25.83 |
| <i>Q. acutissima</i> | 109.05 | 19.07 | <i>Q. variabilis</i> | 106.90 | 25.39 |
| <i>Q. acutissima</i> | 109.49 | 19.42 | <i>Q. variabilis</i> | 106.94 | 25.62 |
| <i>Q. acutissima</i> | 119.49 | 39.85 | <i>Q. variabilis</i> | 105.42 | 25.12 |
| <i>Q. acutissima</i> | 116.31 | 41.05 | <i>Q. variabilis</i> | 105.56 | 25.32 |
| <i>Q. acutissima</i> | 115.42 | 39.52 | <i>Q. variabilis</i> | 105.55 | 24.91 |
| <i>Q. acutissima</i> | 114.04 | 37.29 | <i>Q. variabilis</i> | 105.74 | 25.05 |
| <i>Q. acutissima</i> | 111.53 | 33.2  | <i>Q. variabilis</i> | 105.39 | 25.62 |
| <i>Q. acutissima</i> | 113.39 | 32.5  | <i>Q. variabilis</i> | 104.93 | 25.02 |
| <i>Q. acutissima</i> | 112.08 | 35.12 | <i>Q. variabilis</i> | 105.77 | 25.30 |
| <i>Q. acutissima</i> | 111.28 | 33.16 | <i>Q. variabilis</i> | 108.00 | 28.17 |
| <i>Q. acutissima</i> | 110.53 | 33.47 | <i>Q. variabilis</i> | 107.88 | 25.97 |
| <i>Q. acutissima</i> | 114.08 | 31.82 | <i>Q. variabilis</i> | 108.54 | 27.52 |
| <i>Q. acutissima</i> | 111.42 | 33.37 | <i>Q. variabilis</i> | 108.70 | 28.34 |
| <i>Q. acutissima</i> | 111.38 | 33.45 | <i>Q. variabilis</i> | 108.65 | 27.91 |
| <i>Q. acutissima</i> | 114.1  | 31.9  | <i>Q. variabilis</i> | 114.73 | 39.38 |
| <i>Q. acutissima</i> | 114.21 | 31.91 | <i>Q. variabilis</i> | 115.33 | 39.14 |
| <i>Q. acutissima</i> | 112.01 | 33.71 | <i>Q. variabilis</i> | 115.36 | 39.36 |
| <i>Q. acutissima</i> | 111.76 | 33.71 | <i>Q. variabilis</i> | 116.31 | 41.05 |
| <i>Q. acutissima</i> | 113.83 | 32.22 | <i>Q. variabilis</i> | 113.67 | 36.59 |
| <i>Q. acutissima</i> | 110.88 | 33.79 | <i>Q. variabilis</i> | 114.16 | 37.84 |
| <i>Q. acutissima</i> | 112.95 | 34.5  | <i>Q. variabilis</i> | 117.71 | 40.15 |
| <i>Q. acutissima</i> | 113.29 | 32.38 | <i>Q. variabilis</i> | 114.28 | 37.31 |
| <i>Q. acutissima</i> | 111.74 | 33.62 | <i>Q. variabilis</i> | 114.53 | 37.32 |
| <i>Q. acutissima</i> | 114.66 | 31.61 | <i>Q. variabilis</i> | 113.96 | 37.17 |
| <i>Q. acutissima</i> | 112.27 | 35.2  | <i>Q. variabilis</i> | 114.96 | 39.95 |
| <i>Q. acutissima</i> | 111.07 | 33.66 | <i>Q. variabilis</i> | 113.75 | 35.97 |
| <i>Q. acutissima</i> | 111.9  | 33.46 | <i>Q. variabilis</i> | 112.13 | 35.25 |
| <i>Q. acutissima</i> | 111.85 | 33.67 | <i>Q. variabilis</i> | 112.28 | 35.20 |
| <i>Q. acutissima</i> | 111.04 | 33.25 | <i>Q. variabilis</i> | 113.38 | 35.42 |
| <i>Q. acutissima</i> | 113.57 | 35.39 | <i>Q. variabilis</i> | 111.66 | 33.76 |
| <i>Q. acutissima</i> | 109.49 | 29.39 | <i>Q. variabilis</i> | 111.65 | 33.84 |
| <i>Q. acutissima</i> | 109.29 | 30.54 | <i>Q. variabilis</i> | 112.48 | 34.17 |
| <i>Q. acutissima</i> | 108.71 | 30.21 | <i>Q. variabilis</i> | 111.85 | 33.69 |
| <i>Q. acutissima</i> | 110.01 | 30.45 | <i>Q. variabilis</i> | 112.10 | 34.14 |
| <i>Q. acutissima</i> | 114.3  | 30.3  | <i>Q. variabilis</i> | 111.90 | 34.08 |
| <i>Q. acutissima</i> | 114.36 | 31.32 | <i>Q. variabilis</i> | 112.01 | 33.71 |
| <i>Q. acutissima</i> | 108.43 | 30.14 | <i>Q. variabilis</i> | 112.43 | 34.46 |

|                      |        |       |                      |        |       |
|----------------------|--------|-------|----------------------|--------|-------|
| <i>Q. acutissima</i> | 114.38 | 30.54 | <i>Q. variabilis</i> | 111.93 | 33.49 |
| <i>Q. acutissima</i> | 108.41 | 30.26 | <i>Q. variabilis</i> | 111.90 | 33.46 |
| <i>Q. acutissima</i> | 108.69 | 30.42 | <i>Q. variabilis</i> | 111.84 | 33.48 |
| <i>Q. acutissima</i> | 110.37 | 30.9  | <i>Q. variabilis</i> | 111.95 | 33.53 |
| <i>Q. acutissima</i> | 109.09 | 29.89 | <i>Q. variabilis</i> | 112.54 | 33.55 |
| <i>Q. acutissima</i> | 114.32 | 30.55 | <i>Q. variabilis</i> | 112.12 | 33.58 |
| <i>Q. acutissima</i> | 110.43 | 31.37 | <i>Q. variabilis</i> | 113.39 | 32.50 |
| <i>Q. acutissima</i> | 109.47 | 32.16 | <i>Q. variabilis</i> | 113.35 | 32.51 |
| <i>Q. acutissima</i> | 108.62 | 30.16 | <i>Q. variabilis</i> | 113.29 | 32.38 |
| <i>Q. acutissima</i> | 109.1  | 30.44 | <i>Q. variabilis</i> | 113.30 | 32.37 |
| <i>Q. acutissima</i> | 110.37 | 32.03 | <i>Q. variabilis</i> | 112.22 | 33.17 |
| <i>Q. acutissima</i> | 109.41 | 29.49 | <i>Q. variabilis</i> | 111.50 | 33.30 |
| <i>Q. acutissima</i> | 110.16 | 29.42 | <i>Q. variabilis</i> | 111.79 | 33.64 |
| <i>Q. acutissima</i> | 112.32 | 28.99 | <i>Q. variabilis</i> | 112.39 | 32.55 |
| <i>Q. acutissima</i> | 110.25 | 28.27 | <i>Q. variabilis</i> | 112.30 | 33.14 |
| <i>Q. acutissima</i> | 110.05 | 28.39 | <i>Q. variabilis</i> | 112.31 | 33.73 |
| <i>Q. acutissima</i> | 100.3  | 27.15 | <i>Q. variabilis</i> | 110.84 | 33.76 |
| <i>Q. acutissima</i> | 99.97  | 26.67 | <i>Q. variabilis</i> | 110.87 | 33.80 |
| <i>Q. acutissima</i> | 109.63 | 28.67 | <i>Q. variabilis</i> | 110.88 | 33.78 |
| <i>Q. acutissima</i> | 112.53 | 24.59 | <i>Q. variabilis</i> | 111.05 | 33.77 |
| <i>Q. acutissima</i> | 113.03 | 28.07 | <i>Q. variabilis</i> | 113.61 | 35.54 |
| <i>Q. acutissima</i> | 109.51 | 29.5  | <i>Q. variabilis</i> | 115.67 | 32.21 |
| <i>Q. acutissima</i> | 109.24 | 27.15 | <i>Q. variabilis</i> | 114.91 | 32.00 |
| <i>Q. acutissima</i> | 110.2  | 28.84 | <i>Q. variabilis</i> | 114.21 | 31.91 |
| <i>Q. acutissima</i> | 110.33 | 27.07 | <i>Q. variabilis</i> | 115.34 | 31.45 |
| <i>Q. acutissima</i> | 110.38 | 26.4  | <i>Q. variabilis</i> | 115.51 | 31.80 |
| <i>Q. acutissima</i> | 101.9  | 25.51 | <i>Q. variabilis</i> | 114.80 | 31.65 |
| <i>Q. acutissima</i> | 111.02 | 26.31 | <i>Q. variabilis</i> | 114.66 | 31.61 |
| <i>Q. acutissima</i> | 113.74 | 26.5  | <i>Q. variabilis</i> | 113.31 | 32.75 |
| <i>Q. acutissima</i> | 118.62 | 32.11 | <i>Q. variabilis</i> | 110.37 | 30.90 |
| <i>Q. acutissima</i> | 118.87 | 32.06 | <i>Q. variabilis</i> | 110.03 | 29.91 |
| <i>Q. acutissima</i> | 120.35 | 31.15 | <i>Q. variabilis</i> | 110.01 | 30.45 |
| <i>Q. acutissima</i> | 119.43 | 31.18 | <i>Q. variabilis</i> | 110.16 | 30.82 |
| <i>Q. acutissima</i> | 119.22 | 32.13 | <i>Q. variabilis</i> | 109.92 | 30.85 |
| <i>Q. acutissima</i> | 119.41 | 34.72 | <i>Q. variabilis</i> | 108.59 | 30.38 |
| <i>Q. acutissima</i> | 119.15 | 34.37 | <i>Q. variabilis</i> | 109.08 | 29.80 |
| <i>Q. acutissima</i> | 118.5  | 32.04 | <i>Q. variabilis</i> | 109.05 | 29.89 |
| <i>Q. acutissima</i> | 114.85 | 28.88 | <i>Q. variabilis</i> | 109.44 | 30.01 |
| <i>Q. acutissima</i> | 117.73 | 28.09 | <i>Q. variabilis</i> | 115.67 | 30.78 |
| <i>Q. acutissima</i> | 114.22 | 25.22 | <i>Q. variabilis</i> | 110.49 | 31.54 |
| <i>Q. acutissima</i> | 116.97 | 29.46 | <i>Q. variabilis</i> | 110.84 | 31.74 |
| <i>Q. acutissima</i> | 115.94 | 29.6  | <i>Q. variabilis</i> | 111.07 | 32.49 |
| <i>Q. acutissima</i> | 115.99 | 29.67 | <i>Q. variabilis</i> | 111.08 | 32.34 |
| <i>Q. acutissima</i> | 116    | 29.55 | <i>Q. variabilis</i> | 110.67 | 32.36 |

|                      |        |       |                      |        |       |
|----------------------|--------|-------|----------------------|--------|-------|
| <i>Q. acutissima</i> | 114.57 | 29.05 | <i>Q. variabilis</i> | 110.98 | 32.05 |
| <i>Q. acutissima</i> | 115.76 | 29.53 | <i>Q. variabilis</i> | 109.73 | 32.25 |
| <i>Q. acutissima</i> | 115.87 | 29.57 | <i>Q. variabilis</i> | 109.76 | 32.15 |
| <i>Q. acutissima</i> | 113.84 | 27.11 | <i>Q. variabilis</i> | 109.51 | 32.40 |
| <i>Q. acutissima</i> | 114.17 | 27.46 | <i>Q. variabilis</i> | 113.94 | 31.87 |
| <i>Q. acutissima</i> | 115.3  | 27.15 | <i>Q. variabilis</i> | 114.43 | 30.55 |
| <i>Q. acutissima</i> | 115.52 | 24.8  | <i>Q. variabilis</i> | 110.79 | 31.10 |
| <i>Q. acutissima</i> | 116.87 | 27.08 | <i>Q. variabilis</i> | 110.65 | 31.36 |
| <i>Q. acutissima</i> | 121.49 | 39.01 | <i>Q. variabilis</i> | 112.94 | 28.19 |
| <i>Q. acutissima</i> | 122.33 | 40.44 | <i>Q. variabilis</i> | 112.94 | 25.42 |
| <i>Q. acutissima</i> | 123.1  | 41.02 | <i>Q. variabilis</i> | 112.71 | 27.28 |
| <i>Q. acutissima</i> | 123.02 | 39.71 | <i>Q. variabilis</i> | 109.81 | 27.22 |
| <i>Q. acutissima</i> | 122.58 | 39.27 | <i>Q. variabilis</i> | 110.33 | 26.36 |
| <i>Q. acutissima</i> | 121.98 | 39.63 | <i>Q. variabilis</i> | 110.01 | 29.21 |
| <i>Q. acutissima</i> | 122.48 | 40.37 | <i>Q. variabilis</i> | 109.83 | 29.67 |
| <i>Q. acutissima</i> | 121.43 | 37.18 | <i>Q. variabilis</i> | 119.43 | 34.73 |
| <i>Q. acutissima</i> | 117.53 | 35.35 | <i>Q. variabilis</i> | 119.30 | 34.65 |
| <i>Q. acutissima</i> | 117.13 | 35.79 | <i>Q. variabilis</i> | 118.75 | 31.92 |
| <i>Q. acutissima</i> | 121.24 | 37.3  | <i>Q. variabilis</i> | 118.43 | 32.07 |
| <i>Q. acutissima</i> | 121.03 | 37.14 | <i>Q. variabilis</i> | 118.98 | 32.16 |
| <i>Q. acutissima</i> | 120.35 | 36.07 | <i>Q. variabilis</i> | 118.79 | 32.13 |
| <i>Q. acutissima</i> | 110.52 | 34.86 | <i>Q. variabilis</i> | 118.84 | 32.07 |
| <i>Q. acutissima</i> | 107.38 | 33.23 | <i>Q. variabilis</i> | 120.43 | 31.27 |
| <i>Q. acutissima</i> | 106.17 | 33.38 | <i>Q. variabilis</i> | 120.49 | 31.30 |
| <i>Q. acutissima</i> | 107.12 | 33.24 | <i>Q. variabilis</i> | 120.63 | 31.00 |
| <i>Q. acutissima</i> | 110.51 | 33.37 | <i>Q. variabilis</i> | 120.40 | 31.29 |
| <i>Q. acutissima</i> | 108.16 | 33.98 | <i>Q. variabilis</i> | 120.23 | 31.53 |
| <i>Q. acutissima</i> | 108.54 | 32.54 | <i>Q. variabilis</i> | 120.11 | 31.44 |
| <i>Q. acutissima</i> | 107.6  | 32.85 | <i>Q. variabilis</i> | 119.70 | 31.22 |
| <i>Q. acutissima</i> | 107.03 | 34.48 | <i>Q. variabilis</i> | 119.65 | 31.22 |
| <i>Q. acutissima</i> | 107.91 | 33.91 | <i>Q. variabilis</i> | 119.76 | 31.31 |
| <i>Q. acutissima</i> | 110.09 | 34.5  | <i>Q. variabilis</i> | 119.32 | 32.17 |
| <i>Q. acutissima</i> | 110.06 | 34.31 | <i>Q. variabilis</i> | 119.09 | 32.14 |
| <i>Q. acutissima</i> | 107.55 | 33.58 | <i>Q. variabilis</i> | 119.31 | 31.79 |
| <i>Q. acutissima</i> | 107.73 | 34.11 | <i>Q. variabilis</i> | 114.98 | 25.84 |
| <i>Q. acutissima</i> | 106.04 | 33.33 | <i>Q. variabilis</i> | 117.60 | 29.55 |
| <i>Q. acutissima</i> | 106.36 | 33.35 | <i>Q. variabilis</i> | 117.30 | 28.84 |
| <i>Q. acutissima</i> | 107.2  | 34.3  | <i>Q. variabilis</i> | 115.91 | 29.50 |
| <i>Q. acutissima</i> | 108.26 | 34.01 | <i>Q. variabilis</i> | 115.90 | 29.59 |
| <i>Q. acutissima</i> | 108.29 | 32.35 | <i>Q. variabilis</i> | 115.76 | 29.52 |
| <i>Q. acutissima</i> | 109.25 | 32.37 | <i>Q. variabilis</i> | 115.99 | 29.58 |
| <i>Q. acutissima</i> | 106.25 | 32.79 | <i>Q. variabilis</i> | 115.99 | 29.60 |
| <i>Q. acutissima</i> | 107.03 | 32.87 | <i>Q. variabilis</i> | 115.04 | 29.37 |
| <i>Q. acutissima</i> | 107.7  | 34.06 | <i>Q. variabilis</i> | 116.03 | 29.51 |

|                      |        |       |                      |        |       |
|----------------------|--------|-------|----------------------|--------|-------|
| <i>Q. acutissima</i> | 106.41 | 33.23 | <i>Q. variabilis</i> | 115.62 | 29.09 |
| <i>Q. acutissima</i> | 106.66 | 33.13 | <i>Q. variabilis</i> | 116.71 | 29.02 |
| <i>Q. acutissima</i> | 106.51 | 32.59 | <i>Q. variabilis</i> | 117.91 | 28.90 |
| <i>Q. acutissima</i> | 108.24 | 33.05 | <i>Q. variabilis</i> | 121.53 | 38.88 |
| <i>Q. acutissima</i> | 106.06 | 32.97 | <i>Q. variabilis</i> | 121.80 | 39.04 |
| <i>Q. acutissima</i> | 107.66 | 34.1  | <i>Q. variabilis</i> | 121.21 | 38.83 |
| <i>Q. acutissima</i> | 109.58 | 32.87 | <i>Q. variabilis</i> | 122.95 | 39.70 |
| <i>Q. acutissima</i> | 107.99 | 33.52 | <i>Q. variabilis</i> | 124.25 | 40.04 |
| <i>Q. acutissima</i> | 121.43 | 31.23 | <i>Q. variabilis</i> | 119.96 | 40.10 |
| <i>Q. acutissima</i> | 101.84 | 26.99 | <i>Q. variabilis</i> | 119.86 | 40.30 |
| <i>Q. acutissima</i> | 104.16 | 30.59 | <i>Q. variabilis</i> | 123.60 | 41.84 |
| <i>Q. acutissima</i> | 101.62 | 26.69 | <i>Q. variabilis</i> | 122.35 | 40.44 |
| <i>Q. acutissima</i> | 101.42 | 26.41 | <i>Q. variabilis</i> | 117.98 | 35.57 |
| <i>Q. acutissima</i> | 102.82 | 26.71 | <i>Q. variabilis</i> | 117.66 | 35.58 |
| <i>Q. acutissima</i> | 107.63 | 30.9  | <i>Q. variabilis</i> | 120.61 | 36.15 |
| <i>Q. acutissima</i> | 105.52 | 28.16 | <i>Q. variabilis</i> | 119.39 | 35.70 |
| <i>Q. acutissima</i> | 103.46 | 29.57 | <i>Q. variabilis</i> | 117.13 | 36.23 |
| <i>Q. acutissima</i> | 103.2  | 29.28 | <i>Q. variabilis</i> | 121.43 | 37.51 |
| <i>Q. acutissima</i> | 102.38 | 29.04 | <i>Q. variabilis</i> | 121.74 | 37.28 |
| <i>Q. acutissima</i> | 100.54 | 27.41 | <i>Q. variabilis</i> | 121.40 | 37.53 |
| <i>Q. acutissima</i> | 106.47 | 30.77 | <i>Q. variabilis</i> | 112.73 | 36.75 |
| <i>Q. acutissima</i> | 106.01 | 31.59 | <i>Q. variabilis</i> | 113.28 | 35.56 |
| <i>Q. acutissima</i> | 102.94 | 32.12 | <i>Q. variabilis</i> | 113.32 | 35.51 |
| <i>Q. acutissima</i> | 102.45 | 29.97 | <i>Q. variabilis</i> | 112.47 | 35.25 |
| <i>Q. acutissima</i> | 101.31 | 27.8  | <i>Q. variabilis</i> | 112.42 | 35.31 |
| <i>Q. acutissima</i> | 105.08 | 32.35 | <i>Q. variabilis</i> | 110.85 | 35.97 |
| <i>Q. acutissima</i> | 100.52 | 28.06 | <i>Q. variabilis</i> | 111.42 | 36.25 |
| <i>Q. acutissima</i> | 103.35 | 30.59 | <i>Q. variabilis</i> | 111.93 | 35.42 |
| <i>Q. acutissima</i> | 103.25 | 31.59 | <i>Q. variabilis</i> | 111.97 | 35.44 |
| <i>Q. acutissima</i> | 100.66 | 28.29 | <i>Q. variabilis</i> | 111.38 | 35.02 |
| <i>Q. acutissima</i> | 102.57 | 30.03 | <i>Q. variabilis</i> | 111.44 | 34.99 |
| <i>Q. acutissima</i> | 101.56 | 27.69 | <i>Q. variabilis</i> | 111.83 | 35.35 |
| <i>Q. acutissima</i> | 102.85 | 29.79 | <i>Q. variabilis</i> | 112.03 | 35.30 |
| <i>Q. acutissima</i> | 102.81 | 30.37 | <i>Q. variabilis</i> | 111.95 | 35.33 |
| <i>Q. acutissima</i> | 103.65 | 30.99 | <i>Q. variabilis</i> | 111.69 | 35.33 |
| <i>Q. acutissima</i> | 103.17 | 29.13 | <i>Q. variabilis</i> | 109.82 | 32.73 |
| <i>Q. acutissima</i> | 102.59 | 29.36 | <i>Q. variabilis</i> | 108.90 | 32.60 |
| <i>Q. acutissima</i> | 103.25 | 27.7  | <i>Q. variabilis</i> | 109.03 | 32.22 |
| <i>Q. acutissima</i> | 103.53 | 28.84 | <i>Q. variabilis</i> | 108.77 | 32.31 |
| <i>Q. acutissima</i> | 103.86 | 31.68 | <i>Q. variabilis</i> | 108.77 | 33.79 |
| <i>Q. acutissima</i> | 104.53 | 32.4  | <i>Q. variabilis</i> | 108.66 | 33.85 |
| <i>Q. acutissima</i> | 105.17 | 32.34 | <i>Q. variabilis</i> | 109.40 | 32.44 |
| <i>Q. acutissima</i> | 107.22 | 31.58 | <i>Q. variabilis</i> | 109.47 | 32.34 |
| <i>Q. acutissima</i> | 108.03 | 32.09 | <i>Q. variabilis</i> | 108.25 | 33.14 |

|                      |        |       |                      |        |       |
|----------------------|--------|-------|----------------------|--------|-------|
| <i>Q. acutissima</i> | 103.81 | 30.41 | <i>Q. variabilis</i> | 108.28 | 33.07 |
| <i>Q. acutissima</i> | 98.5   | 28.23 | <i>Q. variabilis</i> | 108.22 | 33.07 |
| <i>Q. acutissima</i> | 95.47  | 29.5  | <i>Q. variabilis</i> | 109.33 | 32.78 |
| <i>Q. acutissima</i> | 95.09  | 29.11 | <i>Q. variabilis</i> | 109.59 | 32.86 |
| <i>Q. acutissima</i> | 95.12  | 29.93 | <i>Q. variabilis</i> | 109.54 | 31.90 |
| <i>Q. acutissima</i> | 95.14  | 28.79 | <i>Q. variabilis</i> | 108.54 | 32.58 |
| <i>Q. acutissima</i> | 95.18  | 29.22 | <i>Q. variabilis</i> | 107.48 | 34.15 |
| <i>Q. acutissima</i> | 95.04  | 30.06 | <i>Q. variabilis</i> | 106.89 | 34.76 |
| <i>Q. acutissima</i> | 97.01  | 28.3  | <i>Q. variabilis</i> | 107.72 | 34.10 |
| <i>Q. acutissima</i> | 106.05 | 23.53 | <i>Q. variabilis</i> | 107.90 | 34.13 |
| <i>Q. acutissima</i> | 102.73 | 25.4  | <i>Q. variabilis</i> | 107.66 | 34.10 |
| <i>Q. acutissima</i> | 102.26 | 24.58 | <i>Q. variabilis</i> | 107.61 | 34.03 |
| <i>Q. acutissima</i> | 104.33 | 24.52 | <i>Q. variabilis</i> | 107.53 | 33.81 |
| <i>Q. acutissima</i> | 103.93 | 27.69 | <i>Q. variabilis</i> | 107.62 | 34.06 |
| <i>Q. acutissima</i> | 103.87 | 23.08 | <i>Q. variabilis</i> | 107.56 | 34.06 |
| <i>Q. acutissima</i> | 102.5  | 24.35 | <i>Q. variabilis</i> | 107.34 | 33.20 |
| <i>Q. acutissima</i> | 102.85 | 24.49 | <i>Q. variabilis</i> | 108.02 | 33.57 |
| <i>Q. acutissima</i> | 104.7  | 27.42 | <i>Q. variabilis</i> | 107.98 | 33.66 |
| <i>Q. acutissima</i> | 99.03  | 27.52 | <i>Q. variabilis</i> | 106.84 | 33.69 |
| <i>Q. acutissima</i> | 100.09 | 25.38 | <i>Q. variabilis</i> | 106.90 | 33.74 |
| <i>Q. acutissima</i> | 99.94  | 26.87 | <i>Q. variabilis</i> | 106.08 | 33.56 |
| <i>Q. acutissima</i> | 98.4   | 27.44 | <i>Q. variabilis</i> | 106.12 | 33.54 |
| <i>Q. acutissima</i> | 100.7  | 22.43 | <i>Q. variabilis</i> | 106.36 | 33.35 |
| <i>Q. acutissima</i> | 103.42 | 27.22 | <i>Q. variabilis</i> | 106.06 | 33.41 |
| <i>Q. acutissima</i> | 101.3  | 24.14 | <i>Q. variabilis</i> | 106.61 | 33.17 |
| <i>Q. acutissima</i> | 98.45  | 25.62 | <i>Q. variabilis</i> | 106.63 | 33.15 |
| <i>Q. acutissima</i> | 98.32  | 24.12 | <i>Q. variabilis</i> | 107.05 | 32.84 |
| <i>Q. acutissima</i> | 104.75 | 23.47 | <i>Q. variabilis</i> | 106.93 | 32.81 |
| <i>Q. acutissima</i> | 101.43 | 26.64 | <i>Q. variabilis</i> | 106.60 | 32.82 |
| <i>Q. acutissima</i> | 98.58  | 24.94 | <i>Q. variabilis</i> | 106.09 | 32.73 |
| <i>Q. acutissima</i> | 100.14 | 27.38 | <i>Q. variabilis</i> | 108.08 | 33.04 |
| <i>Q. acutissima</i> | 100.24 | 26.88 | <i>Q. variabilis</i> | 107.57 | 33.58 |
| <i>Q. acutissima</i> | 98.94  | 24.62 | <i>Q. variabilis</i> | 107.74 | 32.44 |
| <i>Q. acutissima</i> | 98.13  | 25.36 | <i>Q. variabilis</i> | 108.00 | 32.35 |
| <i>Q. acutissima</i> | 104.18 | 25.48 | <i>Q. variabilis</i> | 110.64 | 33.61 |
| <i>Q. acutissima</i> | 100.05 | 27.18 | <i>Q. variabilis</i> | 110.20 | 33.22 |
| <i>Q. acutissima</i> | 104.02 | 28.61 | <i>Q. variabilis</i> | 109.68 | 33.59 |
| <i>Q. acutissima</i> | 102.37 | 24.58 | <i>Q. variabilis</i> | 110.59 | 33.45 |
| <i>Q. acutissima</i> | 98.35  | 25.18 | <i>Q. variabilis</i> | 109.01 | 33.52 |
| <i>Q. acutissima</i> | 103.89 | 28.33 | <i>Q. variabilis</i> | 109.59 | 34.45 |
| <i>Q. acutissima</i> | 98.34  | 27.78 | <i>Q. variabilis</i> | 108.99 | 33.99 |
| <i>Q. acutissima</i> | 103.95 | 22.76 | <i>Q. variabilis</i> | 108.54 | 33.82 |
| <i>Q. acutissima</i> | 100.39 | 26.21 | <i>Q. variabilis</i> | 109.36 | 34.20 |
| <i>Q. acutissima</i> | 100.41 | 26.71 | <i>Q. variabilis</i> | 107.88 | 33.90 |

|                      |        |       |                      |        |       |
|----------------------|--------|-------|----------------------|--------|-------|
| <i>Q. acutissima</i> | 99.57  | 25.48 | <i>Q. variabilis</i> | 107.85 | 33.85 |
| <i>Q. acutissima</i> | 102.37 | 24.18 | <i>Q. variabilis</i> | 108.34 | 34.06 |
| <i>Q. acutissima</i> | 101.08 | 22.08 | <i>Q. variabilis</i> | 110.18 | 35.55 |
| <i>Q. acutissima</i> | 102.75 | 25.15 | <i>Q. variabilis</i> | 102.55 | 30.91 |
| <i>Q. acutissima</i> | 105.32 | 23.31 | <i>Q. variabilis</i> | 103.88 | 31.75 |
| <i>Q. acutissima</i> | 105.18 | 27.77 | <i>Q. variabilis</i> | 103.58 | 30.95 |
| <i>Q. acutissima</i> | 98.51  | 25.5  | <i>Q. variabilis</i> | 104.41 | 31.00 |
| <i>Q. acutissima</i> | 100.98 | 22.65 | <i>Q. variabilis</i> | 101.54 | 29.00 |
| <i>Q. acutissima</i> | 100    | 24.08 | <i>Q. variabilis</i> | 102.13 | 29.65 |
| <i>Q. acutissima</i> | 98.83  | 28.47 | <i>Q. variabilis</i> | 106.36 | 32.09 |
| <i>Q. acutissima</i> | 101.26 | 21.94 | <i>Q. variabilis</i> | 105.58 | 32.25 |
| <i>Q. acutissima</i> | 99.43  | 22.13 | <i>Q. variabilis</i> | 105.67 | 32.38 |
| <i>Q. acutissima</i> | 100.57 | 22.06 | <i>Q. variabilis</i> | 106.00 | 32.31 |
| <i>Q. acutissima</i> | 100.27 | 21.99 | <i>Q. variabilis</i> | 103.27 | 29.26 |
| <i>Q. acutissima</i> | 101.96 | 23.96 | <i>Q. variabilis</i> | 103.38 | 29.55 |
| <i>Q. acutissima</i> | 100.52 | 21.94 | <i>Q. variabilis</i> | 102.83 | 27.69 |
| <i>Q. acutissima</i> | 105.2  | 23.76 | <i>Q. variabilis</i> | 103.21 | 27.70 |
| <i>Q. acutissima</i> | 102.27 | 23.27 | <i>Q. variabilis</i> | 103.58 | 28.29 |
| <i>Q. acutissima</i> | 104.52 | 27.83 | <i>Q. variabilis</i> | 102.24 | 28.56 |
| <i>Q. acutissima</i> | 98.63  | 26.02 | <i>Q. variabilis</i> | 101.93 | 28.33 |
| <i>Q. acutissima</i> | 98.58  | 24.71 | <i>Q. variabilis</i> | 102.57 | 27.42 |
| <i>Q. acutissima</i> | 98.68  | 25.27 | <i>Q. variabilis</i> | 102.31 | 27.93 |
| <i>Q. acutissima</i> | 98.27  | 25.26 | <i>Q. variabilis</i> | 102.51 | 28.68 |
| <i>Q. acutissima</i> | 100.07 | 27.48 | <i>Q. variabilis</i> | 104.44 | 31.89 |
| <i>Q. acutissima</i> | 101.07 | 26.07 | <i>Q. variabilis</i> | 104.84 | 32.21 |
| <i>Q. acutissima</i> | 102.22 | 25.32 | <i>Q. variabilis</i> | 104.25 | 32.50 |
| <i>Q. acutissima</i> | 100.49 | 26.26 | <i>Q. variabilis</i> | 104.23 | 32.43 |
| <i>Q. acutissima</i> | 99.5   | 26.21 | <i>Q. variabilis</i> | 101.98 | 27.05 |
| <i>Q. acutissima</i> | 99.57  | 27.49 | <i>Q. variabilis</i> | 101.39 | 27.13 |
| <i>Q. acutissima</i> | 101.15 | 25.57 | <i>Q. variabilis</i> | 102.78 | 30.41 |
| <i>Q. acutissima</i> | 102.04 | 24.72 | <i>Q. variabilis</i> | 102.69 | 29.38 |
| <i>Q. acutissima</i> | 100    | 27.33 | <i>Q. variabilis</i> | 102.32 | 29.24 |
| <i>Q. acutissima</i> | 105.22 | 23.67 | <i>Q. variabilis</i> | 120.65 | 23.00 |
| <i>Q. acutissima</i> | 99.1   | 27.1  | <i>Q. variabilis</i> | 120.87 | 23.46 |
| <i>Q. acutissima</i> | 102.47 | 26.01 | <i>Q. variabilis</i> | 121.11 | 24.04 |
| <i>Q. acutissima</i> | 104.68 | 23.44 | <i>Q. variabilis</i> | 120.99 | 23.84 |
| <i>Q. acutissima</i> | 98.28  | 25    | <i>Q. variabilis</i> | 121.54 | 25.06 |
| <i>Q. acutissima</i> | 102.42 | 25.52 | <i>Q. variabilis</i> | 121.12 | 23.13 |
| <i>Q. acutissima</i> | 102.37 | 23.01 | <i>Q. variabilis</i> | 121.18 | 24.25 |
| <i>Q. acutissima</i> | 102.33 | 25.22 | <i>Q. variabilis</i> | 121.35 | 24.82 |
| <i>Q. acutissima</i> | 104.69 | 23.36 | <i>Q. variabilis</i> | 121.08 | 24.63 |
| <i>Q. acutissima</i> | 102.94 | 25.19 | <i>Q. variabilis</i> | 121.44 | 24.36 |
| <i>Q. acutissima</i> | 105.09 | 27.6  | <i>Q. variabilis</i> | 117.58 | 40.13 |
| <i>Q. acutissima</i> | 103.04 | 24.63 | <i>Q. variabilis</i> | 97.03  | 28.51 |



|                      |        |       |                      |        |       |
|----------------------|--------|-------|----------------------|--------|-------|
| <i>Q. acutissima</i> | 100.25 | 26.43 | <i>Q. variabilis</i> | 85.38  | 28.38 |
| <i>Q. acutissima</i> | 103.2  | 23.8  | <i>Q. variabilis</i> | 88.98  | 27.40 |
| <i>Q. acutissima</i> | 99.05  | 27.71 | <i>Q. variabilis</i> | 98.70  | 24.62 |
| <i>Q. acutissima</i> | 103.72 | 22.94 | <i>Q. variabilis</i> | 98.80  | 25.30 |
| <i>Q. acutissima</i> | 101.48 | 21.98 | <i>Q. variabilis</i> | 99.16  | 25.12 |
| <i>Q. acutissima</i> | 100.22 | 27.02 | <i>Q. variabilis</i> | 101.01 | 25.89 |
| <i>Q. acutissima</i> | 101.26 | 25.27 | <i>Q. variabilis</i> | 101.22 | 25.87 |
| <i>Q. acutissima</i> | 98.3   | 24.26 | <i>Q. variabilis</i> | 101.92 | 25.19 |
| <i>Q. acutissima</i> | 104.46 | 23.71 | <i>Q. variabilis</i> | 101.26 | 25.27 |
| <i>Q. acutissima</i> | 103.93 | 28.47 | <i>Q. variabilis</i> | 101.63 | 24.63 |
| <i>Q. acutissima</i> | 100.03 | 25.7  | <i>Q. variabilis</i> | 101.78 | 24.56 |
| <i>Q. acutissima</i> | 105.21 | 23.61 | <i>Q. variabilis</i> | 101.20 | 25.59 |
| <i>Q. acutissima</i> | 104.56 | 23.91 | <i>Q. variabilis</i> | 100.51 | 25.88 |
| <i>Q. acutissima</i> | 104.39 | 23.31 | <i>Q. variabilis</i> | 100.40 | 25.96 |
| <i>Q. acutissima</i> | 101.26 | 24.59 | <i>Q. variabilis</i> | 100.29 | 25.68 |
| <i>Q. acutissima</i> | 100.63 | 25.83 | <i>Q. variabilis</i> | 100.11 | 26.00 |
| <i>Q. acutissima</i> | 103.94 | 22.54 | <i>Q. variabilis</i> | 99.76  | 26.10 |
| <i>Q. acutissima</i> | 100.83 | 24.45 | <i>Q. variabilis</i> | 99.96  | 26.63 |
| <i>Q. acutissima</i> | 99.94  | 22.55 | <i>Q. variabilis</i> | 100.36 | 25.18 |
| <i>Q. acutissima</i> | 104.68 | 23.13 | <i>Q. variabilis</i> | 100.12 | 25.65 |
| <i>Q. acutissima</i> | 104.32 | 23.62 | <i>Q. variabilis</i> | 99.95  | 25.66 |
| <i>Q. acutissima</i> | 98.01  | 24.67 | <i>Q. variabilis</i> | 99.69  | 25.54 |
| <i>Q. acutissima</i> | 119.22 | 30.16 | <i>Q. variabilis</i> | 99.60  | 25.61 |
| <i>Q. acutissima</i> | 119.79 | 28.24 | <i>Q. variabilis</i> | 98.92  | 28.47 |
| <i>Q. acutissima</i> | 119.11 | 27.57 | <i>Q. variabilis</i> | 98.91  | 28.03 |
| <i>Q. acutissima</i> | 118.98 | 30.17 | <i>Q. variabilis</i> | 99.20  | 27.40 |
| <i>Q. acutissima</i> | 118.16 | 29.26 | <i>Q. variabilis</i> | 99.06  | 27.70 |
| <i>Q. acutissima</i> | 120.7  | 29.99 | <i>Q. variabilis</i> | 99.72  | 27.86 |
| <i>Q. acutissima</i> | 120.14 | 30.21 | <i>Q. variabilis</i> | 102.86 | 23.33 |
| <i>Q. acutissima</i> | 120.35 | 27.83 | <i>Q. variabilis</i> | 103.36 | 23.44 |
| <i>Q. acutissima</i> | 120.79 | 30.36 | <i>Q. variabilis</i> | 103.72 | 23.02 |
| <i>Q. acutissima</i> | 122.27 | 30.42 | <i>Q. variabilis</i> | 103.15 | 22.99 |
| <i>Q. acutissima</i> | 122.4  | 30.01 | <i>Q. variabilis</i> | 102.46 | 24.97 |
| <i>Q. acutissima</i> | 120.75 | 30.63 | <i>Q. variabilis</i> | 102.57 | 25.75 |
| <i>Q. acutissima</i> | 120.39 | 27.51 | <i>Q. variabilis</i> | 102.75 | 26.00 |
| <i>Q. acutissima</i> | 119.47 | 30.15 | <i>Q. variabilis</i> | 102.84 | 26.00 |
| <i>Q. acutissima</i> | 120.46 | 28.3  | <i>Q. variabilis</i> | 102.75 | 25.14 |
| <i>Q. acutissima</i> | 121.07 | 29.44 | <i>Q. variabilis</i> | 102.78 | 25.09 |
| <i>Q. acutissima</i> | 122.25 | 29.84 | <i>Q. variabilis</i> | 103.01 | 25.36 |
| <i>Q. acutissima</i> | 121.03 | 29.11 | <i>Q. variabilis</i> | 100.34 | 26.73 |
| <i>Q. acutissima</i> | 119.4  | 27.41 | <i>Q. variabilis</i> | 100.90 | 27.41 |
| <i>Q. acutissima</i> | 120.06 | 29.71 | <i>Q. variabilis</i> | 99.84  | 27.10 |
| <i>Q. acutissima</i> | 120.12 | 30.22 | <i>Q. variabilis</i> | 99.87  | 26.80 |
| <i>Q. acutissima</i> | 119.45 | 30.33 | <i>Q. variabilis</i> | 100.28 | 27.12 |

|                      |        |       |                      |        |       |
|----------------------|--------|-------|----------------------|--------|-------|
| <i>Q. acutissima</i> | 119.47 | 30.33 | <i>Q. variabilis</i> | 100.01 | 24.85 |
| <i>Q. acutissima</i> | 119.33 | 27.85 | <i>Q. variabilis</i> | 98.87  | 26.88 |
| <i>Q. acutissima</i> | 119.39 | 28.63 | <i>Q. variabilis</i> | 98.91  | 26.53 |
| <i>Q. acutissima</i> | 122.4  | 29.92 | <i>Q. variabilis</i> | 98.61  | 27.86 |
| <i>Q. acutissima</i> | 119.04 | 29.61 | <i>Q. variabilis</i> | 99.42  | 26.50 |
| <i>Q. acutissima</i> | 119.28 | 29.48 | <i>Q. variabilis</i> | 98.83  | 25.98 |
| <i>Q. acutissima</i> | 106.52 | 30.13 | <i>Q. variabilis</i> | 100.62 | 24.74 |
| <i>Q. acutissima</i> | 107.23 | 29.04 | <i>Q. variabilis</i> | 100.94 | 24.54 |
| <i>Q. acutissima</i> | 107.32 | 29.18 | <i>Q. variabilis</i> | 100.64 | 24.43 |
| <i>Q. acutissima</i> | 107.08 | 29.07 | <i>Q. variabilis</i> | 100.65 | 24.19 |
| <i>Q. acutissima</i> | 107.22 | 29.05 | <i>Q. variabilis</i> | 101.00 | 24.51 |
| <i>Q. acutissima</i> | 106.23 | 29.49 | <i>Q. variabilis</i> | 100.76 | 24.48 |
| <i>Q. acutissima</i> | 110.1  | 31.21 | <i>Q. variabilis</i> | 99.95  | 22.54 |
| <i>Q. acutissima</i> | 107.21 | 29.13 | <i>Q. variabilis</i> | 105.66 | 23.66 |
| <i>Q. acutissima</i> | 109.24 | 31.35 | <i>Q. variabilis</i> | 105.02 | 24.05 |
| <i>Q. acutissima</i> | 109.27 | 30.65 | <i>Q. variabilis</i> | 105.17 | 23.72 |
| <i>Q. acutissima</i> | 106.57 | 29.93 | <i>Q. variabilis</i> | 104.51 | 23.18 |
| <i>Q. acutissima</i> | 109.29 | 30.78 | <i>Q. variabilis</i> | 104.40 | 23.75 |
| <i>Q. acutissima</i> | 109.11 | 31.36 | <i>Q. variabilis</i> | 104.18 | 23.65 |
| <i>Q. acutissima</i> | 108.11 | 29.2  | <i>Q. variabilis</i> | 100.27 | 21.99 |
| <i>Q. acutissima</i> | 109.57 | 31.4  | <i>Q. variabilis</i> | 102.97 | 24.87 |
| <i>Q. acutissima</i> | 108.77 | 28.84 | <i>Q. variabilis</i> | 102.42 | 24.19 |
| <i>Q. acutissima</i> | 108.74 | 30.26 | <i>Q. variabilis</i> | 102.84 | 24.50 |
| <i>Q. acutissima</i> | 112.16 | 31.99 | <i>Q. variabilis</i> | 102.76 | 24.11 |
| <i>Q. acutissima</i> | 106.69 | 33.09 | <i>Q. variabilis</i> | 101.93 | 24.04 |
| <i>Q. acutissima</i> | 109.02 | 35.71 | <i>Q. variabilis</i> | 102.25 | 24.86 |
| <i>Q. acutissima</i> | 108.28 | 33.3  | <i>Q. variabilis</i> | 101.94 | 23.74 |
| <i>Q. acutissima</i> | 112.1  | 33.58 | <i>Q. variabilis</i> | 101.81 | 23.69 |
| <i>Q. acutissima</i> | 113.35 | 32.51 | <i>Q. variabilis</i> | 102.94 | 26.93 |
|                      |        |       | <i>Q. variabilis</i> | 103.68 | 28.23 |
|                      |        |       | <i>Q. variabilis</i> | 104.67 | 27.39 |
|                      |        |       | <i>Q. variabilis</i> | 119.13 | 29.85 |
|                      |        |       | <i>Q. variabilis</i> | 119.44 | 30.35 |
|                      |        |       | <i>Q. variabilis</i> | 119.46 | 30.32 |
|                      |        |       | <i>Q. variabilis</i> | 120.15 | 30.26 |
|                      |        |       | <i>Q. variabilis</i> | 119.63 | 27.97 |
|                      |        |       | <i>Q. variabilis</i> | 119.14 | 28.09 |
|                      |        |       | <i>Q. variabilis</i> | 121.88 | 29.84 |
|                      |        |       | <i>Q. variabilis</i> | 121.80 | 29.81 |
|                      |        |       | <i>Q. variabilis</i> | 121.09 | 29.73 |
|                      |        |       | <i>Q. variabilis</i> | 121.75 | 29.96 |
|                      |        |       | <i>Q. variabilis</i> | 121.08 | 29.27 |
|                      |        |       | <i>Q. variabilis</i> | 122.39 | 29.98 |
|                      |        |       | <i>Q. variabilis</i> | 106.56 | 29.43 |

|                      |        |       |
|----------------------|--------|-------|
| <i>Q. variabilis</i> | 106.42 | 29.86 |
| <i>Q. variabilis</i> | 109.15 | 31.30 |
| <i>Q. variabilis</i> | 109.28 | 31.34 |
| <i>Q. variabilis</i> | 109.42 | 30.70 |
| <i>Q. variabilis</i> | 107.18 | 29.05 |
| <i>Q. variabilis</i> | 107.21 | 29.13 |
| <i>Q. variabilis</i> | 106.93 | 29.13 |
| <i>Q. variabilis</i> | 107.12 | 28.93 |
| <i>Q. variabilis</i> | 108.37 | 30.92 |
| <i>Q. variabilis</i> | 110.02 | 30.95 |
| <i>Q. variabilis</i> | 110.06 | 31.23 |
| <i>Q. variabilis</i> | 110.08 | 31.29 |
| <i>Q. variabilis</i> | 109.39 | 31.67 |
| <i>Q. variabilis</i> | 109.48 | 31.54 |

**Table S2.** Climate variables and their abbreviations in our research.

| <b>climate variables</b>                                   | <b>abbreviations</b> |
|------------------------------------------------------------|----------------------|
| Annual Mean Temperature                                    | AMT                  |
| Mean Diurnal Range (Mean of monthly (max temp - min temp)) | MDR                  |
| Isothermality (BIO2/BIO7) (×100)                           | Isothermality        |
| Temperature Seasonality (standard deviation ×100)          | TS                   |
| Max Temperature of Warmest Month                           | MTWM                 |
| Min Temperature of Coldest Month                           | MTCM                 |
| Temperature Annual Range (BIO5-BIO6)                       | TAR                  |
| Mean Temperature of Wettest Quarter                        | MTWQ                 |
| Mean Temperature of Driest Quarter                         | MTDQ                 |
| Mean Temperature of Warmest Quarter                        | MTWaQ                |
| Mean Temperature of Coldest Quarter                        | MTCQ                 |
| Annual Precipitation                                       | AP                   |
| Precipitation of Wettest Month                             | PWM                  |
| Precipitation of Driest Month                              | PDM                  |
| Precipitation Seasonality (Coefficient of Variation)       | PS                   |
| Precipitation of Wettest Quarter                           | PWQ                  |
| Precipitation of Driest Quarter                            | PDQ                  |
| Precipitation of Warmest Quarter                           | PWaQ                 |
| Precipitation of Coldest Quarter                           | PCQ                  |

**Table S3.** Pearson correlation coefficients among 7 selected climate variables.

|      | AMT    | IT     | TS     | MTCM   | AP     | PS     | PDQ |
|------|--------|--------|--------|--------|--------|--------|-----|
| AMT  | 1      |        |        |        |        |        |     |
| IT   | -0.110 | 1      |        |        |        |        |     |
| TS   | -0.282 | -0.681 | 1      |        |        |        |     |
| MTCM | 0.770  | 0.191  | -0.704 | 1      |        |        |     |
| AP   | 0.623  | -0.004 | -0.567 | 0.787  | 1      |        |     |
| PS   | -0.514 | 0.038  | 0.304  | -0.542 | -0.427 | 1      |     |
| PDQ  | 0.602  | -0.112 | -0.449 | 0.717  | 0.859  | -0.607 | 1   |
